# Supplementary material
Source: ML conference proceedings conference paper supplement (https://openaccess.thecvf.com/content/CVPR2023/html/Hu_A_Dynamic_Multi-Scale_CVPR_2023_paper.html)
Supplement: Supplementary file 1 [file Hu_A_Dynamic_Multi-Scale_CVPR_2023_supplemental.pdf]

# Supplemental File to “A Dynamic Multi-Scale Voxel Flow Network for Video Prediction”

We provide more details of DMVFN for video prediction. Specifically, we provide

- societal impact in §1.
- visualization of voxel flow §2;
- more ablation studies in §3;

## 1. Societal Impact

This work potentially benefits video prediction and dynamic neural network fields. The authors believe that this work has small potential negative impacts.

## 2. Visualization of Voxel Flow

We visualize the voxel flow predicted by DMVFN in Figure 1. We use the optical flow generated by RAFT [4] as a reference. We observe that the optical flow  $\mathbf{f}_{t+1 \rightarrow t}$  and the map  $1 - \mathbf{m}$  of most pixels are successfully predicted by DMVFN. This demonstrates that our DMVFN can indeed accurately predict a voxel flow.

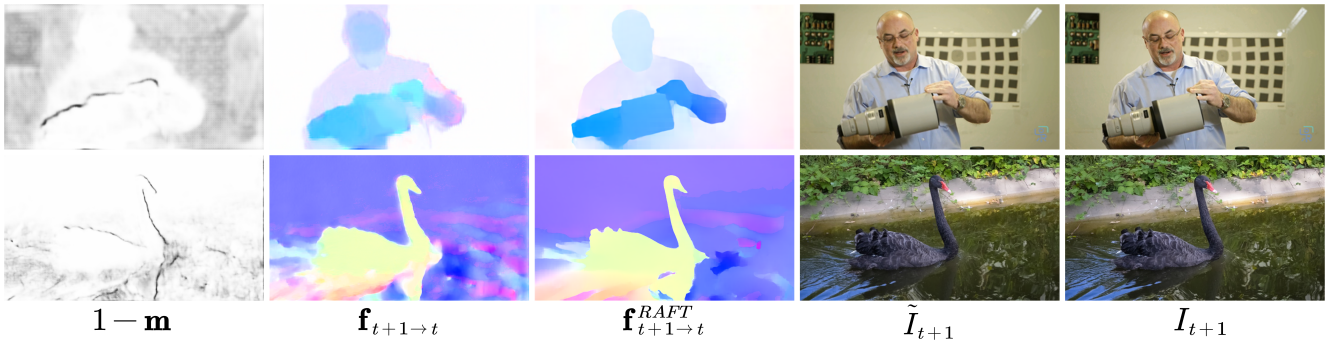

Figure 1: **Visualization** of the map  $1 - \mathbf{m}$ , the optical flow  $\mathbf{f}_{t+1 \rightarrow t}$ , the optical flow by RAFT [4]  $\mathbf{f}_{t+1 \rightarrow t}^{RAFT}$ , the predicted frame  $\tilde{I}_{t+1}$  and the “ground truth”  $I_{t+1}$ .

## 3. More Ablation Study Results

**5) How does  $\beta$  influence the performance of DMVFN during inference?** The  $\beta$  is an important factor to control the model complexity and prediction capability during inference. Here, we adjust  $\beta$  during the inference phase, as shown in Table 1. DMVFN with larger  $\beta$  enjoys better MS-SSIM results but suffers from higher complexity.

Table 1: **Results of DMVFN with different  $\beta$**  evaluated on KITTI benchmark [2].

| Settings ( $\beta =$ )       | 0.3         | 0.4   | 0.5   | 0.6   | 0.7   | 0.8          |
|------------------------------|-------------|-------|-------|-------|-------|--------------|
| GFLOPs                       | <b>2.62</b> | 3.88  | 5.15  | 5.94  | 6.21  | 6.40         |
| LPIPS                        | 16.47       | 12.91 | 10.74 | 10.26 | 10.24 | <b>10.23</b> |
| MS-SSIM ( $\times 10^{-2}$ ) | 78.78       | 85.13 | 88.53 | 88.89 | 88.89 | 88.89        |

**6) How to design the loss function?** To study this problem, we train our DMVFN and DMVFN (w/o routing) only optimizing the loss on output of the last block  $\tilde{I}_{t+1}$  (denoted as “single supervision”). The results listed in Table 2 show the advantages of our loss function  $L_{total}$ .  $L_{total}$  is calculated on all intermediate results of DMVFN.

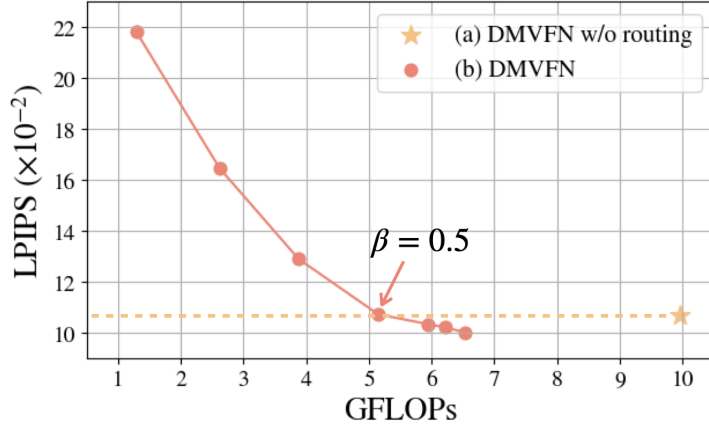

Figure 2: **Control the complexity of DMVFN by adjusting  $\beta$ .** DMVFN saves half GFLOPs of comparable performance compared to DMVFN without routing.

Table 2: **Results of DMVFN with different loss settings.** The evaluation metric is MS-SSIM ( $\times 10^{-2}$ ).

| Settings                        | Cityscapes   |              |              | KITTI        |              |              | Davis17-Val  |              | Vimeo-Test   |
|---------------------------------|--------------|--------------|--------------|--------------|--------------|--------------|--------------|--------------|--------------|
|                                 | t+1          | t+3          | t+5          | t+1          | t+3          | t+5          | t+1          | t+3          | t+1          |
| w/o routing, single supervision | 95.19        | 87.77        | 81.22        | 87.91        | 76.33        | 67.99        | 84.69        | 74.92        | 97.18        |
| w/o routing                     | 95.29        | 87.91        | 81.48        | 88.06        | 76.53        | 68.29        | <b>84.81</b> | <b>75.05</b> | <b>97.24</b> |
| single supervision              | 95.65        | 89.10        | 83.27        | 88.34        | 77.88        | 70.18        | 83.83        | 74.68        | 96.95        |
| DMVFN                           | <b>95.73</b> | <b>89.24</b> | <b>83.45</b> | <b>88.53</b> | <b>78.01</b> | <b>70.52</b> | 83.97        | 74.81        | 97.01        |

Table 3: **Routing Module based on STEBS is effective.** The evaluation metric is MS-SSIM ( $\times 10^{-2}$ ).

| Settings       | Cityscapes   |              |              | KITTI        |              |              | Davis-Val    |              | Vimeo-Test   |
|----------------|--------------|--------------|--------------|--------------|--------------|--------------|--------------|--------------|--------------|
|                | t+1          | t+3          | t+5          | t+1          | t+3          | t+5          | t+1          | t+3          | t+1          |
| w/o routing    | 95.29        | 87.91        | 81.48        | 88.06        | 76.53        | 68.29        | <b>84.81</b> | <b>75.05</b> | <b>97.24</b> |
| Random         | 91.97        | 82.11        | 70.05        | 81.31        | 69.89        | 62.42        | 81.32        | 73.03        | 96.88        |
| Gumbel Softmax | 95.05        | 87.57        | 79.54        | 87.42        | 75.56        | 65.83        | 83.64        | 74.43        | 96.98        |
| STEBS          | <b>95.73</b> | <b>89.24</b> | <b>83.45</b> | <b>88.53</b> | <b>78.01</b> | <b>70.52</b> | 83.97        | 74.81        | 97.01        |

**More details about our Ablation Study 2) in the main paper.** In Table 3, we summarize the quantitative results of three variants (“w/o routing”, “Random” and “Gumbel Softmax”) on four datasets (i.e., Cityscapes [1], KITTI [2], Davis-Val [3], and Vimeo-Test [5]). This demonstrates the effectiveness of our STEBS.

**More details about our Ablation Study 3) in the main paper.** In Table 4, we summarize the quantitative results of DMVFN with different scaling factor settings, including:

- “[1]”: [1,1,1,1,1,1,1,1]
- “[2]”: [2,2,2,2,2,2,2,2]
- “[4]”: [4,4,4,4,4,4,4,4]
- “[1,2]”: [1,1,1,1,2,2,2,2]
- “[1,4]”: [1,1,1,1,4,4,4,4]
- “[2,1]”: [2,2,2,2,1,1,1,1]

- “[4,1]”: [4,4,4,4,1,1,1,1,1]
- “[1,2,4]”: [1,1,1,2,2,2,4,4,4]
- “[4,2,1]”: [4,4,4,2,2,2,1,1,1]

DMVFN [4,2,1] performs better than others, and the gap is more obvious for long-term future frames.

Table 4: **Results of DMVFN with different scaling factor settings.** The evaluation metric is MS-SSIM ( $\times 10^{-2}$ ).

| Settings        | Cityscapes   |              |              | KITTI        |              |              | Davis-Val    |              | Vimeo-Test   |
|-----------------|--------------|--------------|--------------|--------------|--------------|--------------|--------------|--------------|--------------|
|                 | t+1          | t+3          | t+5          | t+1          | t+3          | t+5          | t+1          | t+3          | t+1          |
| DMVFN [1]       | 94.70        | 87.26        | 80.93        | 87.64        | 76.71        | 68.76        | 81.75        | 71.73        | 96.04        |
| DMVFN [2]       | 95.51        | 87.76        | 81.30        | 87.06        | 76.90        | 69.05        | 81.77        | 72.58        | 96.07        |
| DMVFN [4]       | 94.32        | 87.50        | 81.36        | 84.35        | 75.34        | 68.67        | 81.02        | 72.16        | 95.99        |
| DMVFN [1, 2]    | 94.13        | 86.58        | 80.55        | 87.85        | 76.92        | 69.36        | 82.96        | 73.55        | 96.70        |
| DMVFN [1, 4]    | 94.56        | 86.50        | 80.69        | 85.46        | 76.03        | 68.99        | 81.38        | 71.98        | 96.02        |
| DMVFN [2, 1]    | 95.30        | 87.93        | 82.02        | 87.97        | 77.23        | 69.58        | 83.03        | 72.54        | 96.61        |
| DMVFN [4, 1]    | 95.59        | 88.41        | 83.02        | 88.16        | 77.39        | 69.95        | 83.64        | 74.35        | 96.95        |
| DMVFN [1, 2, 4] | 94.20        | 86.56        | 80.81        | 87.77        | 76.89        | 69.72        | 82.72        | 73.66        | 96.76        |
| DMVFN [4, 2, 1] | <b>95.73</b> | <b>89.24</b> | <b>83.45</b> | <b>88.53</b> | <b>78.01</b> | <b>70.52</b> | <b>83.97</b> | <b>74.81</b> | <b>97.01</b> |

**More details about our Ablation Study 4) in the main paper.** In Table 5, we summarize the quantitative results of three variants (“w/o r, w/o path”, “w/o r” and “w/o path”) on four datasets (i.e., Cityscapes [1], KITTI [2], Davis-Val [3], and Vimeo-Test [5]).

Table 5: **Spatial path is effective in DMVFN.** The evaluation metric is MS-SSIM ( $\times 10^{-2}$ ).

| Settings        | Cityscapes   |              |              | KITTI        |              |              | Davis-Val    |              | Vimeo-Test   |
|-----------------|--------------|--------------|--------------|--------------|--------------|--------------|--------------|--------------|--------------|
|                 | t+1          | t+3          | t+5          | t+1          | t+3          | t+5          | t+1          | t+3          | t+1          |
| w/o r, w/o path | 94.99        | 87.59        | 80.98        | 87.75        | 76.22        | 67.86        | 84.45        | 74.78        | 97.05        |
| w/o r           | 95.29        | 87.91        | 81.48        | 88.06        | 76.53        | 68.29        | <b>84.81</b> | <b>75.05</b> | <b>97.24</b> |
| w/o path        | 95.55        | 88.89        | 83.03        | 88.29        | 77.53        | 69.86        | 83.75        | 74.51        | 96.89        |
| DMVFN           | <b>95.73</b> | <b>89.24</b> | <b>83.45</b> | <b>88.53</b> | <b>78.01</b> | <b>70.52</b> | 83.97        | 74.81        | 97.01        |

**More details about our Ablation Study 5) in the main paper.** In Table 6, we summarize the quantitative results of different  $\beta$  during inference on four datasets (i.e., Cityscapes [1], KITTI [2], Davis-Val [3], and Vimeo-Test [5]).

Table 6: **Results of DMVFN with different  $\beta$**  evaluated on Cityscapes benchmark [1] and Vimeo-Test benchmark [5].

| Settings                     | Cityscapes  |       |       |       |       |              | Vimeo-Test  |       |       |       |              |              |
|------------------------------|-------------|-------|-------|-------|-------|--------------|-------------|-------|-------|-------|--------------|--------------|
|                              | $\beta =$   | 0.3   | 0.4   | 0.5   | 0.6   | 0.7          | 0.8         | 0.3   | 0.4   | 0.5   | 0.6          | 0.7          |
| GFLOPs                       | <b>6.56</b> | 9.81  | 12.71 | 15.30 | 16.23 | 17.82        | <b>1.38</b> | 2.08  | 2.77  | 3.40  | 3.74         | 3.92         |
| LPIPS                        | 8.88        | 7.06  | 5.58  | 5.20  | 5.15  | <b>5.12</b>  | 5.18        | 4.18  | 3.69  | 3.48  | 3.42         | <b>3.40</b>  |
| MS-SSIM ( $\times 10^{-2}$ ) | 90.48       | 93.54 | 95.73 | 96.03 | 96.07 | <b>96.12</b> | 93.61       | 96.13 | 97.01 | 97.19 | <b>97.20</b> | <b>97.20</b> |

## References

- [1] Marius Cordts, Mohamed Omran, Sebastian Ramos, Timo Rehfeld, Markus Enzweiler, Rodrigo Benenson, Uwe Franke, Stefan Roth, and Bernt Schiele. The cityscapes dataset for semantic urban scene understanding. In *IEEE Conf. Comput. Vis. Pattern Recog.*, 2016. 2, 3
- [2] Andreas Geiger, Philip Lenz, Christoph Stiller, and Raquel Urtasun. Vision meets robotics: The kitti dataset. *I. J. Robotics Res.*, 2013. 1, 2, 3
- [3] Jordi Pont-Tuset, Federico Perazzi, Sergi Caelles, Pablo Arbeláez, Alex Sorkine-Hornung, and Luc Van Gool. The 2017 davis challenge on video object segmentation. *arXiv preprint arXiv:1704.00675*, 2017. 2, 3
- [4] Zachary Teed and Jia Deng. Raft: Recurrent all-pairs field transforms for optical flow. In *Eur. Conf. Comput. Vis.*, 2020. 1
- [5] Tianfan Xue, Baian Chen, Jiajun Wu, Donglai Wei, and William T Freeman. Video enhancement with task-oriented flow. In *Int. J. Comput. Vis.*, 2019. 2, 3
